# Supplementary material for: Genome-Wide Screening for Enteric Colonization Factors in Carbapenem-Resistant ST258 Klebsiella pneumoniae
Source: PubMed Central journal article supplement (PMC6414703; doi:10.1128/mbio.02663-18), 2019-03-12

**Figure S1**

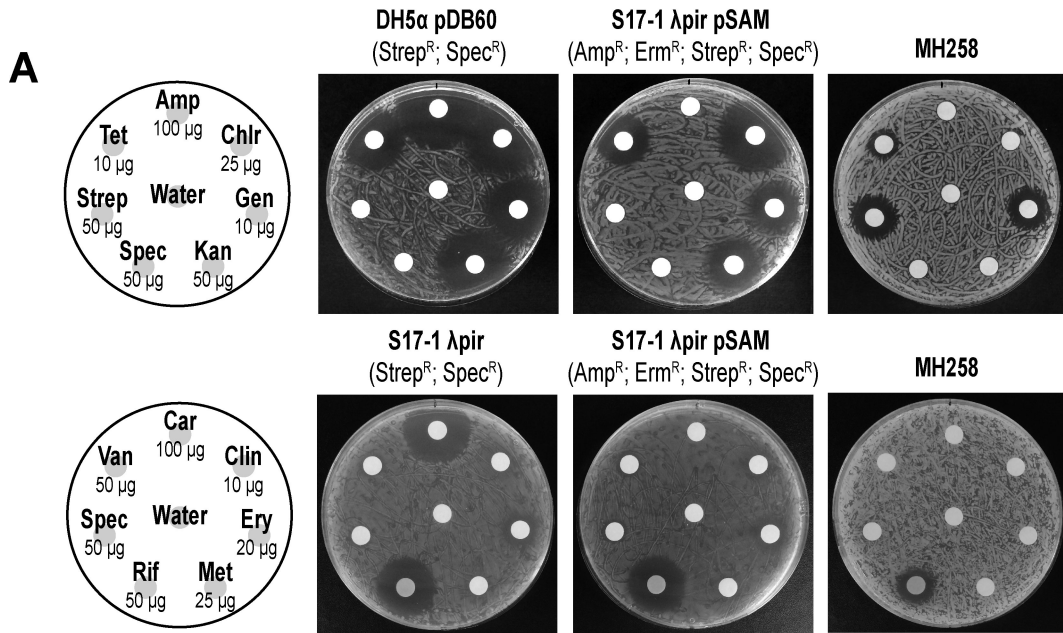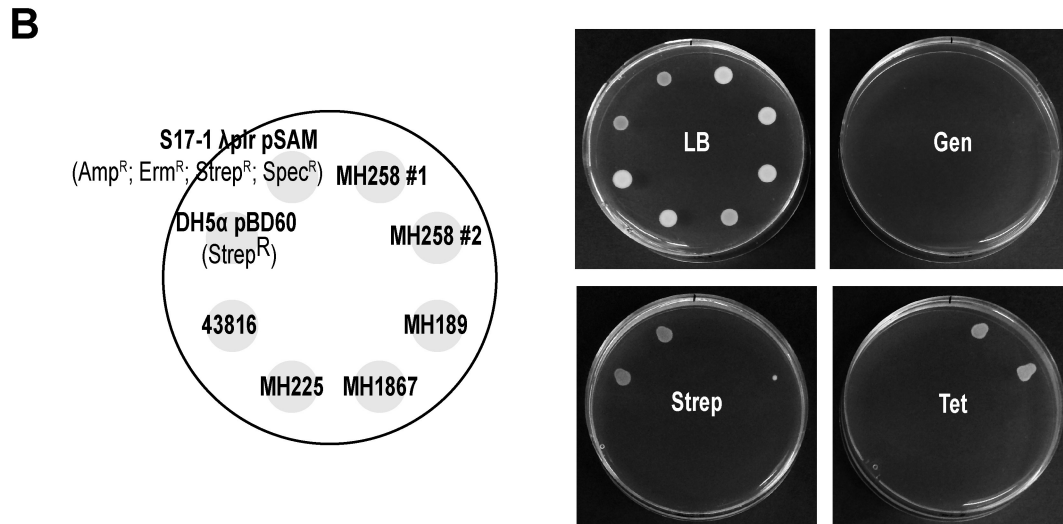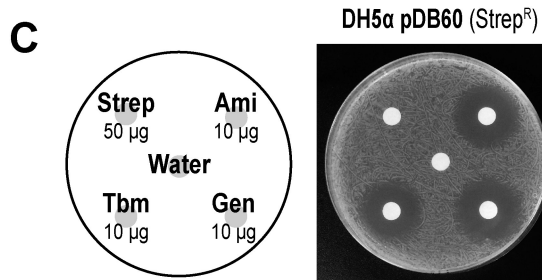

Supplement: mBio.02663-18-sf001.pdf [file mBio.02663-18-sf001.pdf]
